# Supplementary material for: Mechanism of the oxidation of organic dyes in the presence of nanoceria
Source: Royal Society of Chemistry journal article supplement (doi:10.1039/c0cc04679e), 2011-01-01
Supplement: c0cc04679e.pdf [file c0cc04679e.pdf]

## Electronic Supporting Information

*for*

### **Mechanism of the Oxidation of Organic Dyes in the Presence of Nanoceria**

Yanfen Peng, Xiaojun Chen, Guangshun Yi and Zhiqiang Gao\*

Institute of Bioengineering and Nanotechnology, 31 Biopolis Way, Singapore 138669

Department of Chemistry, National University of Singapore, Singapore 117543.

**Nanoceria preparation.** All chemicals were obtained from Sigma-Aldrich and were used as received. Nanoceria was prepared following a published procedure.<sup>S1</sup> Briefly, 2.17 g Ce(NO<sub>3</sub>)<sub>3</sub>·6H<sub>2</sub>O was dissolved in 5.0 ml de-ionized water. Under magnetic stirring, the solution was added to 30 ml 30% ammonium hydroxide. 0.50 M polyacrylic acid was added to the reaction mixture 60 s after the reaction and the resulting mixture was stirring for 3 h. Separation and purification was done by multiple centrifugation-decantation-dispersion cycles with water.

**Transmission electron microscopic (TEM) test of nanoceria.** Nanoceria was studied using TEM and high resolution transmission electron microscopy (HRTEM). Nanoceria was deposited on a carbon coated copper grid for HRTEM analysis by solvent evaporation method. The HRTEM images of the prepared particles were obtained with a Philips (Tecnai Series) transmission electron microscope operating at 300 keV. Figure S1 is a TEM micrograph of nanoceria, showing nearly spherical particles with a diameter of 3–6 nm. A series of diffraction rings in the selected-area electron diffraction (SAED) pattern (Figure S1 insert) indicated that nanoceria is essentially polycrystalline.

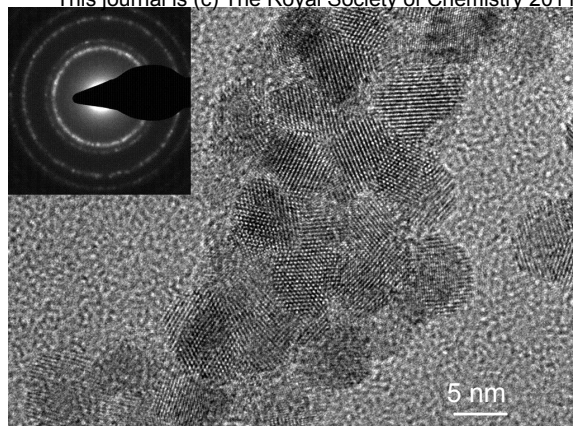

**Figure S1.** A TEM micrograph of nanoceria.  
Insert: SAED pattern.

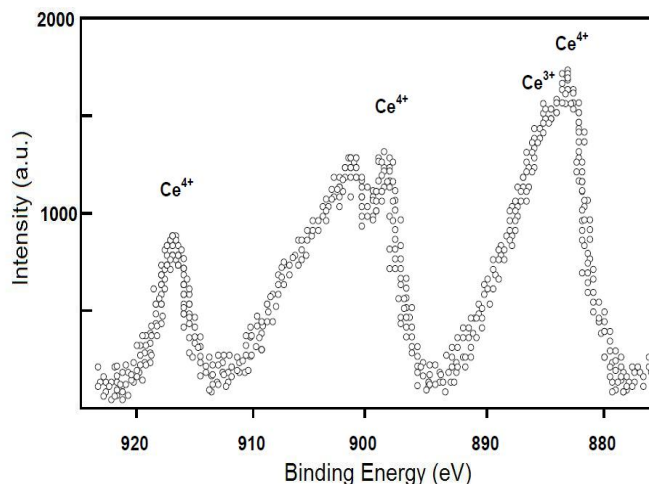

**Figure S2.** A XPS spectrum of nanoceria.

**X-ray photoelectron spectroscopic (XPS) test.** Composition of nanoceria was studied by XPS using a VG ESCALAB 220I-XL XPS system (Thermo VG Scientific Ltd., UK). The base pressure during XPS analysis was  $10^{-9}$  Torr and Mg-K $\alpha$  X-ray radiation (1253.6 eV) at a power of 200 watts was used. The binding energy of the Au<sub>4f7/2</sub> was used to calibrate the spectrometer. As shown in Figure S3, the peaks between 875–895 eV correspond to Ce 3d<sub>5/2</sub>, between 895–910 eV correspond to Ce 3d<sub>3/2</sub> and peak at 916 eV is a characteristic satellite peak indicating the presence of Ce<sup>4+</sup>. The peaks at 885.0, 899.5 and 903.5 eV are indicative of Ce<sup>3+</sup> peaks and those at 882.1, 898.0, and 916.40 eV are indicating the presence of Ce<sup>4+</sup>. Deconvolution analysis showed that nanoceria is made of 40–45% CeO<sub>2</sub> and 55–60% Ce<sub>2</sub>O<sub>3</sub>, similar to those obtained earlier with nanoceria prepared under the same experimental conditions.<sup>S2</sup>

## References

S1. A. Asati, S. Santra, C. Kaittanis, S. Nath and J. M. Perez, *Angew. Chem. Int. Ed.*, 2009, **48**, 2308.

S2. J. M. Perez, A. Asati, S. Nath and C. Kaittanis, *Small*, 2008, **5**, 552.
